# Supplementary material for: Astrochemistry of transition metals? The selected cases of [FeN]+, [FeNH]+and [(CO)2FeN]+: pathways toward CH3NH2and HNCO
Source: Royal Society of Chemistry journal article supplement (doi:10.1039/c4cp03218g), 2014-01-01
Supplement: c4cp03218g1.pdf [file c4cp03218g1.pdf]

Electronic Supplementary Information

**Astrochemistry of Transition Metals? The Selected Cases of  $[\text{FeN}]^+$ ,  $[\text{FeNH}]^+$  and  $[(\text{CO})_2\text{FeN}]^+$ : Pathways toward  $\text{CH}_3\text{NH}_2$  and  $\text{HNCO}$**

Marco Fioroni\*

Konrad-Müller Str. 17  
52249 Eschweiler, Germany

e-mail: [mfioroni@lycos.com](mailto:mfioroni@lycos.com)

```
#  
# General Input Orca 2.9.1 for Optimization and Frequency calculations  
#
```

```
%pal nprocs 2  
end
```

```
! UKS B2PLYP SlowConv TightSCF Grid4 NoFinalGrid  
! Opt  
%scf Maxiter=200  
end
```

```
%basis basis TZV  
newgto N "TZV(2d/sp)" end  
newgto C "TZV(2d/sp)" end  
newgto O "TZV(2d/sp)" end  
newgto H "TZV(p/s)" end  
end
```

```
* xyz 1 4  
Fe -0.90976 0.33981 0.00000 newgto "TZV(2f/sppd)" end  
N 0.77979 0.72132 0.00000  
H -2.42220 -0.07507 -0.00115  
*
```

```
$new_job  
! UKS B2PLYP SlowConv TightSCF Grid4 NoFinalGrid MORRead  
! NumFreq  
%base "FREQ_30_100_200_298_K"  
%moinp "OPT.gbw"  
%scf Maxiter=200  
end
```

```
%freq Temp 30, 100, 200, 298.15  
CentralDiff true  
Increment 0.003  
end
```

```
%basis basis TZV  
newgto Fe "TZV(2f/sppd)" end  
newgto N "TZV(2d/sp)" end  
newgto C "TZV(2d/sp)" end  
newgto O "TZV(2d/sp)" end  
newgto H "TZV(p/s)" end  
end
```

```
* xyzfile 1 4
```

```
#  
# General Input Orca 2.9.1 for Minimum Energy Crossing Point search  
#
```

```
%pal nprocs 2  
end
```

```
! UKS B2PLYP SlowConv TightSCF Grid4 NoFinalGrid
```

```
! Opt SurfCrossOpt
```

```
%geom MaxIter 150
```

```
end
```

```
%mecp Mult 1
```

```
end
```

```
%scf Maxiter=150
```

```
end
```

```
%basis basis TZV
```

```
newgto N "TZV(2d/sp)" end
```

```
newgto C "TZV(2d/sp)" end
```

```
newgto O "TZV(2d/sp)" end
```

```
newgto H "TZV(p/s)" end
```

```
end
```

```
* xyz 1 3
```

```
Fe -1.390583 -0.081985 -0.022504 newgto "TZV(2f/sppd)" end
```

```
N 0.273220 0.182330 0.385391
```

```
C -3.581820 -0.429323 -0.464172
```

```
H -4.633764 -0.589122 -0.695506
```

```
H -3.062602 -1.301273 -0.891282
```

```
H -3.327189 0.520889 -0.959627
```

```
H -3.532170 -0.381105 0.633649
```

```
*
```

```
$new_job
```

```
! UKS B2PLYP SlowConv TightSCF Grid4 NoFinalGrid MORRead
```

```
! SurfCrossNumFreq
```

```
%base "FREQ_30_100_200_298_K"
```

```
%moinp "MECP_FREQ_PES2.gbw"
```

```
%scf Maxiter=200
```

```
end
```

```
%mecp Mult 1
```

```
end
```

```
%freq Temp 30, 100, 200, 298.15
```

```
CentralDiff true
```

```
Increment 0.0025
```

```
end
```

%basis basis TZV

newgto Fe "TZV(2f/sppd)" end

newgto N "TZV(2d/sp)" end

newgto C "TZV(2d/sp)" end

newgto O "TZV(2d/sp)" end

newgto H "TZV(p/s)" end

end

\* xyzfile 1 3

### Energies = hartree

**Calculated Energies: [FeN]<sup>+</sup> + CH<sub>4</sub> + H → Fe<sup>+</sup> + CH<sub>3</sub>NH<sub>2</sub>    M=1**  
**[FeNH]<sup>+</sup> + CH<sub>4</sub> → Fe<sup>+</sup> + CH<sub>3</sub>NH<sub>2</sub>    M=2**

|                            | Reactants             | Reactants           | Reactants          | Intermedia                            | Intermedia                                        | Intermedia                            | Intermedia                              | TS_I                                               | TS_II                            | TS_III                             | Products              | Products                         | Products                                                           |
|----------------------------|-----------------------|---------------------|--------------------|---------------------------------------|---------------------------------------------------|---------------------------------------|-----------------------------------------|----------------------------------------------------|----------------------------------|------------------------------------|-----------------------|----------------------------------|--------------------------------------------------------------------|
| M=1                        | [FeN] <sup>+</sup>    | CH <sub>4</sub>     | H                  | [Fe-NH-CH <sub>3</sub> ] <sup>+</sup> | CH <sub>4</sub> <sup>***</sup> [FeN] <sup>+</sup> | [HN-Fe-CH <sub>3</sub> ] <sup>+</sup> | [H-Fe-NH-CH <sub>3</sub> ] <sup>+</sup> | C <sup>**</sup> Fe <sup>**</sup> N <sup>**</sup> H | N <sup>***</sup> CH <sub>3</sub> | Fe <sup>**</sup> H <sup>**</sup> N | M=2 Fe <sup>+</sup>   | CH <sub>3</sub> -NH <sub>2</sub> | [Fe <sup>***</sup> NH <sub>2</sub> -CH <sub>3</sub> ] <sup>+</sup> |
| E(el)                      | -1317.80355226        | -40.48493205        | -0.49861309        | -1358.38204185                        | -1358.32728552                                    | -1358.32702241                        | -1358.95396751                          | -1358.28286229                                     | -1358.30287462                   | -1358.96036541                     | -1263.09477594        | -95.80523172                     | -1359.02872693                                                     |
| E(ZPE)                     | 0.00127564            | 0.04534893          | 0.00000000         | 0.05365559                            | 0.04772007                                        | 0.04694083                            | 0.05980267                              | 0.04535452                                         | 0.04836099                       | 0.06007328                         | -0.00000092           | 0.06461473                       | 0.06798173                                                         |
| E(vib)                     | 0.00000000            | 0.00000000          | 0.00000000         | 0.00000086                            | 0.00004448                                        | 0.00000120                            | 0.00000182                              | 0.00000031                                         | 0.00000000                       | 0.00000001                         | 0.00000000            | 0.00000000                       | 0.00000006                                                         |
| E(rot)                     | 0.00009500            | 0.00014251          | 0.00000000         | 0.00014251                            | 0.00014251                                        | 0.00014251                            | 0.00014251                              | 0.00014251                                         | 0.00014251                       | 0.00014251                         | 0.00000000            | 0.00014251                       | 0.00014251                                                         |
| E(trans)                   | 0.00014251            | 0.00014251          | 0.00014251         | 0.00014251                            | 0.00014251                                        | 0.00014251                            | 0.00014251                              | 0.00014251                                         | 0.00014251                       | 0.00014251                         | 0.00014251            | 0.00014251                       | 0.00014251                                                         |
| <b>U</b>                   | <b>-1317.80203911</b> | <b>-40.43929810</b> | <b>-0.49847058</b> | <b>-1358.32810038</b>                 | <b>-1358.27923595</b>                             | <b>-1358.27979536</b>                 | <b>-1358.89387800</b>                   | <b>-1358.23722244</b>                              | <b>-1358.25422861</b>            | <b>-1358.90000710</b>              | <b>-1263.09463435</b> | <b>-95.74033197</b>              | <b>-1358.96046012</b>                                              |
| <b>H=U+k<sub>B</sub>*T</b> | <b>-1317.80194411</b> | <b>-40.43920310</b> | <b>-0.49837558</b> | <b>-1358.32800538</b>                 | <b>-1358.27914095</b>                             | <b>-1358.27970036</b>                 | <b>-1358.89378300</b>                   | <b>-1358.23712744</b>                              | <b>-1358.25413361</b>            | <b>-1358.89991210</b>              | <b>-1263.09453935</b> | <b>-95.74023697</b>              | <b>-1358.96036512</b>                                              |
| T*S(el)                    | 0.00000000            | 0.00000000          | 0.00006585         | 0.00000000                            | 0.00000000                                        | 0.00000000                            | 0.00006585                              | 0.00000000                                         | 0.00000000                       | 0.00006585                         | 0.00006585            | 0.00000000                       | 0.00006585                                                         |
| T*S(vib)                   | 0.00000000            | 0.00000000          | 0.00000000         | 0.00000099                            | 0.00006208                                        | 0.00000140                            | 0.00000213                              | 0.00000035                                         | 0.00000000                       | 0.00000001                         | 0.00000000            | 0.00000000                       | 0.00000006                                                         |
| T* S(rot)                  | 0.00044621            | 0.00015936          | 0.00000000         | 0.00079680                            | 0.00063744                                        | 0.00079680                            | 0.00081274                              | 0.00078087                                         | 0.00079680                       | 0.00079680                         | 0.00000000            | 0.00060557                       | 0.00082867                                                         |
| T* S(trans)                | 0.00130230            | 0.00109264          | 0.00069829         | 0.00133176                            | 0.00133176                                        | 0.00133176                            | 0.00133342                              | 0.00133176                                         | 0.00133176                       | 0.00133342                         | 0.00127041            | 0.00118678                       | 0.00133342                                                         |
| <b>T*S</b>                 | <b>0.00174851</b>     | <b>0.00125200</b>   | <b>0.00076414</b>  | <b>0.00212955</b>                     | <b>0.00203128</b>                                 | <b>0.00212996</b>                     | <b>0.00221414</b>                       | <b>0.00211298</b>                                  | <b>0.00212856</b>                | <b>0.00219608</b>                  | <b>0.00133626</b>     | <b>0.00179235</b>                | <b>0.00222800</b>                                                  |
| H                          | -1317.80194411        | -40.43920310        | -0.49837558        | -1358.32800538                        | -1358.27914095                                    | -1358.27970036                        | -1358.89378300                          | -1358.23712744                                     | -1358.25413361                   | -1358.89991210                     | -1263.09453935        | -95.74023697                     | -1358.96036512                                                     |
| T*S                        | 0.00174851            | 0.00125200          | 0.00076414         | 0.00212955                            | 0.00203128                                        | 0.00212996                            | 0.00221414                              | 0.00211298                                         | 0.00212856                       | 0.00219608                         | 0.00133626            | 0.00179235                       | 0.00222800                                                         |
| <b>G=H-TS</b>              | <b>-1317.80369262</b> | <b>-40.44045510</b> | <b>-0.49913972</b> | <b>-1358.33013493</b>                 | <b>-1358.28117223</b>                             | <b>-1358.28183032</b>                 | <b>-1358.89599713</b>                   | <b>-1358.23924041</b>                              | <b>-1358.25626217</b>            | <b>-1358.90210818</b>              | <b>-1263.09587561</b> | <b>-95.74202932</b>              | <b>-1358.96259312</b>                                              |

|                            | Reactants             | Intermedia                                         | Intermedia                                          | TS_II                                           | TS_I                              |
|----------------------------|-----------------------|----------------------------------------------------|-----------------------------------------------------|-------------------------------------------------|-----------------------------------|
| M=2                        | [FeNH] <sup>+</sup>   | CH <sub>4</sub> <sup>***</sup> [FeNH] <sup>+</sup> | [H <sub>2</sub> N-Fe-CH <sub>3</sub> ] <sup>+</sup> | H <sub>2</sub> N <sup>***</sup> CH <sub>3</sub> | CH <sub>4</sub> <sup>***</sup> NH |
| E(el)                      | -1318.45493851        | -1358.98315771                                     | -1358.99377786                                      | -1358.96462789                                  | -1358.90976210                    |
| E(ZPE)                     | 0.010114820           | 0.05795295                                         | 0.06135583                                          | 0.06094087                                      | 0.05379606                        |
| E(vib)                     | 0.000000000           | 0.00003297                                         | 0.00000050                                          | 0.00002720                                      | 0.00000042                        |
| E(rot)                     | 0.000142510           | 0.00014251                                         | 0.00014251                                          | 0.00014251                                      | 0.00014251                        |
| E(trans)                   | 0.000142510           | 0.00014251                                         | 0.00014251                                          | 0.00014251                                      | 0.00014251                        |
| <b>U</b>                   | <b>-1318.44453867</b> | <b>-1358.92488677</b>                              | <b>-1358.93213651</b>                               | <b>-1358.90337480</b>                           | <b>-1358.85568060</b>             |
| <b>H=U+k<sub>B</sub>*T</b> | <b>-1318.44444367</b> | <b>-1358.92479177</b>                              | <b>-1358.93204151</b>                               | <b>-1358.90327980</b>                           | <b>-1358.85558560</b>             |
| T*S(el)                    | 0.000065850           | 0.00006585                                         | 0.00006585                                          | 0.00006585                                      | 0.00006585                        |
| T*S(vib)                   | 0.000000000           | 0.00004460                                         | 0.00000057                                          | 0.00003916                                      | 0.00000047                        |
| T* S(rot)                  | -0.000223105          | 0.00074899                                         | 0.00079680                                          | 0.00081274                                      | 0.00081274                        |
| T* S(trans)                | 0.001304340           | 0.00133342                                         | 0.00133342                                          | 0.00133342                                      | 0.00133342                        |
| <b>T*S</b>                 | <b>0.00114709</b>     | <b>0.00219286</b>                                  | <b>0.00219664</b>                                   | <b>0.00225117</b>                               | <b>0.00221248</b>                 |
| H                          | -1318.44444367        | -1358.92479177                                     | -1358.93204151                                      | -1358.90327980                                  | -1358.85558560                    |
| T*S                        | 0.00114709            | 0.00219286                                         | 0.00219664                                          | 0.00225117                                      | 0.00221248                        |
| <b>G=H-TS</b>              | <b>-1318.44559075</b> | <b>-1358.92698463</b>                              | <b>-1358.93423815</b>                               | <b>-1358.90553096</b>                           | <b>-1358.85779807</b>             |

Calculated Energies:  $[\text{FeN}]^+ + \text{CH}_4 + \text{H} \rightarrow \text{Fe}^+ + \text{CH}_3\text{NH}_2$  M=3  
 $[\text{FeNH}]^+ + \text{CH}_4 \rightarrow \text{Fe}^+ + \text{CH}_3\text{NH}_2$  M=4

|                       | Reactants        | Reactants     | Reactants   | Intermedia              | Intermedia                        | Intermedia              | Intermedia                | TS_I                                               | TS_II                       | TS_III                                | Products       | Products                  | Products                                     |
|-----------------------|------------------|---------------|-------------|-------------------------|-----------------------------------|-------------------------|---------------------------|----------------------------------------------------|-----------------------------|---------------------------------------|----------------|---------------------------|----------------------------------------------|
| M=3                   | $[\text{FeN}]^+$ | $\text{CH}_4$ | H           | $[\text{Fe-NH-CH}_3]^+$ | $\text{CH}_4^{***}[\text{FeN}]^+$ | $[\text{HN-Fe-CH}_3]^+$ | $[\text{H-Fe-NH-CH}_3]^+$ | $\text{C}^{**}\text{Fe}^{**}\text{N}^{**}\text{H}$ | $\text{N}^{***}\text{CH}_3$ | $\text{Fe}^{**}\text{H}^{**}\text{N}$ | M=4 Fe*        | $\text{CH}_3\text{-NH}_2$ | $[\text{Fe}^{***}\text{NH}_2\text{-CH}_3]^+$ |
| E(el)                 | -1317.81984059   | -40.48493205  | -0.49861309 | -1358.41389114          | -1358.3385220                     | -1358.35444907          | -1359.00425668            | -1358.29310485                                     | -1358.33592894              | -1358.99027071                        | -1263.17954722 | -95.80523172              | -1359.0700064                                |
| E(ZPE)                | 0.00136354       | 0.04534893    | 0.00000000  | 0.05275756              | 0.04761258                        | 0.04432060              | 0.05930821                | 0.04397538                                         | 0.04874853                  | 0.05900237                            | -0.00000314    | 0.06461473                | 0.06802351                                   |
| E(vib)                | 0.00000000       | 0.00000000    | 0.00000000  | 0.00000003              | 0.00002511                        | 0.00000001              | 0.00000107                | 0.00000000                                         | 0.00000029                  | 0.00000005                            | 0.00000000     | 0.00000000                | 0.00000006                                   |
| E(rot)                | 0.00009500       | 0.00014251    | 0.00000000  | 0.00014251              | 0.00014251                        | 0.00014251              | 0.00014251                | 0.00014251                                         | 0.00014251                  | 0.00014251                            | 0.00000000     | 0.00014251                | 0.00014251                                   |
| E(trans)              | 0.00014251       | 0.00014251    | 0.00014251  | 0.00014251              | 0.00014251                        | 0.00014251              | 0.00014251                | 0.00014251                                         | 0.00014251                  | 0.00014251                            | 0.00014251     | 0.00014251                | 0.00014251                                   |
| U                     | -1317.81823954   | -40.43929810  | -0.49847058 | -1358.36084853          | -1358.29059929                    | -1358.30984344          | -1358.94466238            | -1358.24884445                                     | -1358.28689510              | -1358.93098327                        | -1263.17940785 | -95.74033197              | -1359.00169780                               |
| H=U+k <sub>B</sub> *T | -1317.81814454   | -40.43920310  | -0.49837558 | -1358.36075353          | -1358.29050429                    | -1358.30974844          | -1358.94456738            | -1358.24874945                                     | -1358.28680010              | -1358.93088827                        | -1263.17931285 | -95.74023697              | -1359.00160280                               |
| T*S(el)               | 0.00010437       | 0.00000000    | 0.00006585  | 0.00010437              | 0.00010437                        | 0.00010437              | 0.00013170                | 0.00010437                                         | 0.00010437                  | 0.00013170                            | 0.00013170     | 0.00000000                | 0.00013170                                   |
| T*S(vib)              | 0.00000000       | 0.00000000    | 0.00000000  | 0.00000004              | 0.00003359                        | 0.00000001              | 0.00000123                | 0.00000000                                         | 0.00000033                  | 0.00000006                            | 0.00000000     | 0.00000000                | 0.00000006                                   |
| T* S(rot)             | 0.00044621       | 0.00015936    | 0.00000000  | 0.00079680              | 0.00063744                        | 0.00079680              | 0.00081274                | 0.00079680                                         | 0.00079680                  | 0.00081274                            | 0.00000000     | 0.00060557                | 0.00082867                                   |
| T* S(trans)           | 0.00130230       | 0.00109264    | 0.00069829  | 0.00133176              | 0.00133176                        | 0.00133176              | 0.00133342                | 0.00133176                                         | 0.00133176                  | 0.00133342                            | 0.00127041     | 0.00118678                | 0.00133342                                   |
| T*S                   | 0.00185288       | 0.00125200    | 0.00076414  | 0.00223297              | 0.00210716                        | 0.00223294              | 0.00227909                | 0.00223293                                         | 0.00223326                  | 0.00227792                            | 0.00140211     | 0.00179235                | 0.00229385                                   |
| H                     | -1317.81814454   | -40.43920310  | -0.49837558 | -1358.36075353          | -1358.29050429                    | -1358.30974844          | -1358.94456738            | -1358.24874945                                     | -1358.28680010              | -1358.93088827                        | -1263.17931285 | -95.74023697              | -1359.00160280                               |
| T*S                   | 0.00185288       | 0.00125200    | 0.00076414  | 0.00223297              | 0.00210716                        | 0.00223294              | 0.00227909                | 0.00223293                                         | 0.00223326                  | 0.00227792                            | 0.00140211     | 0.00179235                | 0.00229385                                   |
| G=H-TS                | -1317.81999742   | -40.44045510  | -0.49913972 | -1358.36298650          | -1358.29261145                    | -1358.31198138          | -1358.94684646            | -1358.25098238                                     | -1358.28903336              | -1358.93316618                        | -1263.18071496 | -95.74202932              | -1359.00389665                               |

|                       | Reactants         | Intermedia                         | Intermedia                       | TS_II                                 | TS_I                         |
|-----------------------|-------------------|------------------------------------|----------------------------------|---------------------------------------|------------------------------|
| M=4                   | $[\text{FeNH}]^+$ | $\text{CH}_4^{***}[\text{FeNH}]^+$ | $[\text{H}_2\text{N-Fe-CH}_3]^+$ | $\text{H}_2\text{N}^{***}\text{CH}_3$ | $\text{CH}_4^{***}\text{NH}$ |
| E(el)                 | -1318.47383487    | -1358.9949224                      | -1359.0253023                    | -1359.00568847                        | -1358.92701022               |
| E(ZPE)                | 0.01106589        | 0.05777217                         | 0.06038192                       | 0.06188727                            | 0.05780515                   |
| E(vib)                | 0.00000000        | 0.00000148                         | 0.00001027                       | 0.00000144                            | 0.00000272                   |
| E(rot)                | 0.00014251        | 0.00014251                         | 0.00014251                       | 0.00014251                            | 0.00014251                   |
| E(trans)              | 0.00014251        | 0.00014251                         | 0.00014251                       | 0.00014251                            | 0.00014251                   |
| U                     | -1318.46248396    | -1358.93686373                     | -1358.96462508                   | -1358.94351474                        | -1358.86891733               |
| H=U+k <sub>B</sub> *T | -1318.46238896    | -1358.93676873                     | -1358.96453008                   | -1358.94341974                        | -1358.86882233               |
| T*S(el)               | 0.0001317         | 0.00013170                         | 0.00013170                       | 0.00013170                            | 0.00013170                   |
| T*S(vib)              | 0.00000000        | 0.00000171                         | 0.00001304                       | 0.00000168                            | 0.00000324                   |
| T* S(rot)             | -0.00014342       | 0.00078087                         | 0.00081274                       | 0.00081274                            | 0.00079680                   |
| T* S(trans)           | 0.00130434        | 0.00133342                         | 0.00133342                       | 0.00133342                            | 0.00133342                   |
| T*S                   | 0.00129262        | 0.00224770                         | 0.00229090                       | 0.00227954                            | 0.00226516                   |
| H                     | -1318.46238896    | -1358.93676873                     | -1358.96453008                   | -1358.94341974                        | -1358.86882233               |
| T*S                   | 0.00129262        | 0.00224770                         | 0.00229090                       | 0.00227954                            | 0.00226516                   |
| G=H-TS                | -1318.46368157    | -1358.93901642                     | -1358.96682097                   | -1358.94569927                        | -1358.87108749               |

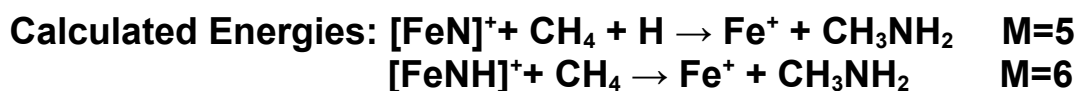

|                            | Reactants                | Reactants             | Reactants          | Intermedia                                | Intermedia                                           | Intermedia                                | Intermedia                                  | TS_I                                                | TS_II                                | TS_III                                | Products                  | Products                             | Products                                                           |
|----------------------------|--------------------------|-----------------------|--------------------|-------------------------------------------|------------------------------------------------------|-------------------------------------------|---------------------------------------------|-----------------------------------------------------|--------------------------------------|---------------------------------------|---------------------------|--------------------------------------|--------------------------------------------------------------------|
| <b>M=5</b>                 | <b>[FeN]<sup>+</sup></b> | <b>CH<sub>4</sub></b> | <b>H</b>           | <b>[Fe-NH-CH<sub>3</sub>]<sup>+</sup></b> | <b>CH<sub>4</sub><sup>***</sup>[FeN]<sup>+</sup></b> | <b>[HN-Fe-CH<sub>3</sub>]<sup>+</sup></b> | <b>[H-Fe-NH-CH<sub>3</sub>]<sup>+</sup></b> | <b>C<sup>**</sup>Fe<sup>**</sup>N<sup>**</sup>H</b> | <b>N<sup>***</sup>CH<sub>3</sub></b> | <b>Fe<sup>**</sup>H<sup>**</sup>N</b> | <b>M=6 Fe<sup>+</sup></b> | <b>CH<sub>3</sub>-NH<sub>2</sub></b> | <b>[Fe<sup>***</sup>NH<sub>2</sub>-CH<sub>3</sub>]<sup>+</sup></b> |
| E(el)                      | -1317.77928248           | -40.48493205          | -0.49861309        | -1358.43816893                            | -1358.32325297                                       | -1358.36673959                            | -1358.99966158                              | -1358.29814080                                      | -1358.35357513                       | -1358.95895279                        | -1263.18233615            | -95.80523172                         | -1359.06364371                                                     |
| E(ZPE)                     | 0.00145084               | 0.04534893            | 0.00000000         | 0.05306516                                | 0.05046811                                           | 0.04918349                                | 0.05827596                                  | 0.04512240                                          | 0.04955330                           | 0.06348768                            | -0.00000581               | 0.06461473                           | 0.06768366                                                         |
| E(vib)                     | 0.00000000               | 0.00000000            | 0.00000000         | 0.00000156                                | 0.00000842                                           | 0.00000790                                | 0.0000052                                   | 0.00000011                                          | 0.00000304                           | 0.00000001                            | 0.00000000                | 0.00000000                           | 0.00000030                                                         |
| E(rot)                     | 0.00009500               | 0.00014251            | 0.00000000         | 0.00014251                                | 0.00014251                                           | 0.00014251                                | 0.00014251                                  | 0.00014251                                          | 0.00014251                           | 0.00014251                            | 0.00000000                | 0.00014251                           | 0.00014251                                                         |
| E(trans)                   | 0.00014251               | 0.00014251            | 0.00014251         | 0.00014251                                | 0.00014251                                           | 0.00014251                                | 0.00014251                                  | 0.00014251                                          | 0.00014251                           | 0.00014251                            | 0.00014251                | 0.00014251                           | 0.00014251                                                         |
| <b>U</b>                   | <b>-1317.77759413</b>    | <b>-40.43929810</b>   | <b>-0.49847058</b> | <b>-1358.38481719</b>                     | <b>-1358.27249142</b>                                | <b>-1358.31726318</b>                     | <b>-1358.94110008</b>                       | <b>-1358.25273327</b>                               | <b>-1358.30373377</b>                | <b>-1358.89518008</b>                 | <b>-1263.18219945</b>     | <b>-95.74033197</b>                  | <b>-1358.99567473</b>                                              |
| <b>H=U+k<sub>B</sub>*T</b> | <b>-1317.77749913</b>    | <b>-40.43920310</b>   | <b>-0.49837558</b> | <b>-1358.38472219</b>                     | <b>-1358.27239642</b>                                | <b>-1358.31716818</b>                     | <b>-1358.94100508</b>                       | <b>-1358.25263827</b>                               | <b>-1358.30363877</b>                | <b>-1358.89508508</b>                 | <b>-1263.18210445</b>     | <b>-95.74023697</b>                  | <b>-1358.99557973</b>                                              |
| T*S(el)                    | 0.00015290               | 0.00000000            | 0.00006585         | 0.00015290                                | 0.00015290                                           | 0.00015290                                | 0.00017022                                  | 0.00015290                                          | 0.00015290                           | 0.00017022                            | 0.00017022                | 0.00000000                           | 0.00017022                                                         |
| T*S(vib)                   | 0.00000000               | 0.00000000            | 0.00000000         | 0.00000182                                | 0.00001042                                           | 0.00000986                                | 0.0000058                                   | 0.00000012                                          | 0.00000364                           | 0.00000002                            | 0.00000000                | 0.00000000                           | 0.00000033                                                         |
| T* S(rot)                  | 0.00039644               | 0.00015936            | 0.00000000         | 0.00079680                                | 0.00079680                                           | 0.00079680                                | 0.00082867                                  | 0.00079680                                          | 0.00079680                           | 0.00082867                            | 0.00000000                | 0.00060557                           | 0.00084461                                                         |
| T* S(trans)                | 0.00130230               | 0.00109264            | 0.00069829         | 0.00133176                                | 0.00133176                                           | 0.00133176                                | 0.00133342                                  | 0.00133176                                          | 0.00133176                           | 0.00133342                            | 0.00127041                | 0.00118678                           | 0.00133342                                                         |
| <b>T*S</b>                 | <b>0.00185164</b>        | <b>0.00125200</b>     | <b>0.00076414</b>  | <b>0.00228328</b>                         | <b>0.00229188</b>                                    | <b>0.00229132</b>                         | <b>0.00233289</b>                           | <b>0.00228158</b>                                   | <b>0.00228510</b>                    | <b>0.00233233</b>                     | <b>0.00144063</b>         | <b>0.00179235</b>                    | <b>0.00234858</b>                                                  |
| H                          | -1317.77749913           | -40.43920310          | -0.49837558        | -1358.38472219                            | -1358.27239642                                       | -1358.31716818                            | -1358.94100508                              | -1358.25263827                                      | -1358.30363877                       | -1358.89508508                        | -1263.18210445            | -95.74023697                         | -1358.99557973                                                     |
| T*S                        | 0.00185164               | 0.00125200            | 0.00076414         | 0.00228328                                | 0.00229188                                           | 0.00229132                                | 0.00233289                                  | 0.00228158                                          | 0.00228510                           | 0.00233233                            | 0.00144063                | 0.00179235                           | 0.00234858                                                         |
| <b>G=H-TS</b>              | <b>-1317.77935077</b>    | <b>-40.44045510</b>   | <b>-0.49913972</b> | <b>-1358.38700547</b>                     | <b>-1358.27468830</b>                                | <b>-1358.31945950</b>                     | <b>-1358.94333797</b>                       | <b>-1358.25491985</b>                               | <b>-1358.30592387</b>                | <b>-1358.89741741</b>                 | <b>-1263.18354508</b>     | <b>-95.74202932</b>                  | <b>-1358.99792831</b>                                              |

|                            | Reactants                 | Intermedia                                            | Intermedia                                            | TS_II                                             | TS_I                                  |
|----------------------------|---------------------------|-------------------------------------------------------|-------------------------------------------------------|---------------------------------------------------|---------------------------------------|
| <b>M=6</b>                 | <b>[FeNH]<sup>+</sup></b> | <b>CH<sub>4</sub><sup>***</sup>[FeNH]<sup>+</sup></b> | <b>[H<sub>2</sub>N-Fe-CH<sub>3</sub>]<sup>+</sup></b> | <b>H<sub>2</sub>N<sup>***</sup>CH<sub>3</sub></b> | <b>CH<sub>4</sub><sup>***</sup>NH</b> |
| E(el)                      | -1318.49039309            | -1359.01041252                                        | -1359.02200693                                        | -1358.97248212                                    | -1358.94056780                        |
| E(ZPE)                     | 0.01082110                | 0.05825507                                            | 0.05865434                                            | 0.06151328                                        | 0.05431437                            |
| E(vib)                     | 0.00000000                | 0.00002062                                            | 0.00001115                                            | 0.00000000                                        | 0.00000038                            |
| E(rot)                     | 0.00014251                | 0.00014251                                            | 0.00014251                                            | 0.00014251                                        | 0.00014251                            |
| E(trans)                   | 0.00014251                | 0.00014251                                            | 0.00014251                                            | 0.00014251                                        | 0.00014251                            |
| <b>U</b>                   | <b>-1318.47928697</b>     | <b>-1358.95185181</b>                                 | <b>-1358.96305642</b>                                 | <b>-1358.91068382</b>                             | <b>-1358.88596803</b>                 |
| <b>H=U+k<sub>B</sub>*T</b> | <b>-1318.47919197</b>     | <b>-1358.95175681</b>                                 | <b>-1358.96296142</b>                                 | <b>-1358.91058882</b>                             | <b>-1358.88587303</b>                 |
| T*S(el)                    | 0.00017022                | 0.00017022                                            | 0.00017022                                            | 0.00017022                                        | 0.00017022                            |
| T*S(vib)                   | 0.00000000                | 0.00002691                                            | 0.00001437                                            | 0.00000000                                        | 0.00000043                            |
| T* S(rot)                  | -0.00007968               | 0.00078087                                            | 0.00079680                                            | 0.00084461                                        | 0.00082867                            |
| T* S(trans)                | 0.00130434                | 0.00133342                                            | 0.00133342                                            | 0.00133342                                        | 0.00133342                            |
| <b>T*S</b>                 | <b>0.00139488</b>         | <b>0.00231142</b>                                     | <b>0.00231481</b>                                     | <b>0.00234825</b>                                 | <b>0.00233274</b>                     |
| H                          | -1318.47919197            | -1358.95175681                                        | -1358.96296142                                        | -1358.91058882                                    | -1358.88587303                        |
| T*S                        | 0.00139488                | 0.00231142                                            | 0.00231481                                            | 0.00234825                                        | 0.00233274                            |
| <b>G=H-TS</b>              | <b>-1318.48058685</b>     | <b>-1358.95406822</b>                                 | <b>-1358.96527623</b>                                 | <b>-1358.91293707</b>                             | <b>-1358.88820577</b>                 |

| Fig. 1        | E <sub>el</sub> (h) |
|---------------|---------------------|
| <b>MECP A</b> | <b>-1358.323091</b> |
| <b>MECP B</b> | <b>-1358.322777</b> |
| <b>MECP C</b> | <b>-1359.000422</b> |
| <b>MECP D</b> | <b>-1358.998407</b> |
| <b>MECP E</b> | <b>-1359.062912</b> |

| Fig. 2        | E <sub>el</sub> (h) |
|---------------|---------------------|
| <b>MECP A</b> | <b>-1359.018648</b> |
| <b>MECP B</b> | <b>-1359.062912</b> |

Calculated Energies:  $[(\text{CO})_2\text{FeN}]^+ + \text{H} \rightarrow [\text{FeCO}]^+ + \text{HNCO}$  M=1

|                       | Reactants                            | Reactants          | Products             | Products             | Intermedia             | Intermedia                | TS_I                 | TS_II                |
|-----------------------|--------------------------------------|--------------------|----------------------|----------------------|------------------------|---------------------------|----------------------|----------------------|
| M=1                   | $[\text{2}(\text{CO})\text{-FeN}]^+$ | H                  | $[\text{Fe-CO}]^+$   | HNCO                 | $[\text{OC-Fe-NCO}]^+$ | $[\text{OC-Fe(H)-NCO}]^+$ | N***CO               | H***NCO              |
| E(el)                 | -403.67246890                        | -0.49861309        | -235.64129481        | -168.63688889        | -403.69158443          | -404.27838392             | -403.62243425        | -404.26216226        |
| E(ZPE)                | 0.02119827                           | 0.00000000         | 0.00669419           | 0.02132887           | 0.02083249             | 0.032076                  | 0.02102507           | 0.02660227           |
| E(vib)                | 0.00001499                           | 0.00000000         | 0.00000000           | 0.00000000           | 0.00002668             | 0.00000763                | 0.00000514           | 0.00001073           |
| E(rot)                | 0.00014251                           | 0.00000000         | 0.00014251           | 0.00014251           | 0.00014251             | 0.00014251                | 0.00014251           | 0.00014251           |
| E(trans)              | 0.00014251                           | 0.00014251         | 0.00014251           | 0.00014251           | 0.00014251             | 0.00014251                | 0.00014251           | 0.00014251           |
| U                     | <b>-403.65097062</b>                 | <b>-0.49847058</b> | <b>-235.63431560</b> | <b>-168.61527500</b> | <b>-403.67044024</b>   | <b>-404.24601527</b>      | <b>-403.60111902</b> | <b>-404.23526424</b> |
| H=U+k <sub>B</sub> *T | <b>-403.65087562</b>                 | <b>-0.49837558</b> | <b>-235.63422060</b> | <b>-168.61518000</b> | <b>-403.67034524</b>   | <b>-404.24592027</b>      | <b>-403.60102402</b> | <b>-404.23516924</b> |
| T*S(el)               | 0.00000000                           | 0.00006585         | 0.00006585           | 0.00000000           | 0.00000000             | 0.00006585                | 0.00000000           | 0.00006585           |
| T*S(vib)              | 0.00001967                           | 0.00000000         | 0.00000000           | 0.00000000           | 0.00003692             | 0.00000949                | 0.00000626           | 0.00001347           |
| T* S(rot)             | 0.00092429                           | 0.00000000         | 0.00006374           | 0.00055776           | 0.00101991             | 0.00094023                | 0.00098804           | 0.00100397           |
| T* S(trans)           | 0.00138621                           | 0.00069829         | 0.00132833           | 0.00123323           | 0.00138621             | 0.00138735                | 0.00138621           | 0.00138735           |
| T*S                   | <b>0.00233017</b>                    | <b>0.00076414</b>  | <b>0.00145792</b>    | <b>0.00179099</b>    | <b>0.00244304</b>      | <b>0.00240292</b>         | <b>0.00238051</b>    | <b>0.00247064</b>    |
| H                     | -403.65087562                        | -0.49837558        | -235.63422060        | -168.61518000        | -403.67034524          | -404.24592027             | -403.60102402        | -404.23516924        |
| T*S                   | 0.00233017                           | 0.00076414         | 0.00145792           | 0.00179099           | 0.00244304             | 0.00240292                | 0.00238051           | 0.00247064           |
| G=H-TS                | <b>-403.65320579</b>                 | <b>-0.49913972</b> | <b>-235.63567852</b> | <b>-168.61697099</b> | <b>-403.67278827</b>   | <b>-404.24832318</b>      | <b>-403.60340452</b> | <b>-404.23763988</b> |

Calculated Energies:  $[(\text{CO})_2\text{FeN}]^+ + \text{H} \rightarrow [\text{FeCO}]^+ + \text{HNCO}$  M=3

|                       | Reactants                            | Reactants          | Products             | Products             | Intermedia             | Intermedia                | TS_I                 | TS_II                |
|-----------------------|--------------------------------------|--------------------|----------------------|----------------------|------------------------|---------------------------|----------------------|----------------------|
| M=3                   | $[\text{2}(\text{CO})\text{-FeN}]^+$ | H                  | $[\text{Fe-CO}]^+$   | HNCO                 | $[\text{OC-Fe-NCO}]^+$ | $[\text{OC-Fe(H)-NCO}]^+$ | N***CO               | H***NCO              |
| E(el)                 | -403.63749587                        | -0.49861309        | -235.6896194         | -168.63688889        | -403.71683605          | -404.3026643              | -403.62351336        | -404.29996997        |
| E(ZPE)                | 0.01635584                           | 0.00000000         | 0.00665406           | 0.02132887           | 0.02069600             | 0.02698733                | 0.01838638           | 0.02567371           |
| E(vib)                | 0.00002015                           | 0.00000000         | 0.00000000           | 0.00000000           | 0.00002812             | 0.00002797                | 0.00000779           | 0.00001698           |
| E(rot)                | 0.00014251                           | 0.00000000         | 0.00014251           | 0.00014251           | 0.00014251             | 0.00014251                | 0.00014251           | 0.00014251           |
| E(trans)              | 0.00014251                           | 0.00014251         | 0.00014251           | 0.00014251           | 0.00014251             | 0.00014251                | 0.00014251           | 0.00014251           |
| U                     | <b>-403.62083486</b>                 | <b>-0.49847058</b> | <b>-235.68268032</b> | <b>-168.61527500</b> | <b>-403.69582691</b>   | <b>-404.27536398</b>      | <b>-403.60483417</b> | <b>-404.27399426</b> |
| H=U+k <sub>B</sub> *T | <b>-403.62073986</b>                 | <b>-0.49837558</b> | <b>-235.68258532</b> | <b>-168.61518000</b> | <b>-403.69573191</b>   | <b>-404.27526898</b>      | <b>-403.60473917</b> | <b>-404.27389926</b> |
| T*S(el)               | 0.00010437                           | 0.00006585         | 0.00013170           | 0.00000000           | 0.00010437             | 0.0001317                 | 0.00010437           | 0.00013170           |
| T*S(vib)              | 0.00002651                           | 0.00000000         | 0.00000000           | 0.00000000           | 0.00003899             | 0.0000399                 | 0.00000966           | 0.00002257           |
| T* S(rot)             | 0.00095616                           | 0.00000000         | 0.00007968           | 0.00055776           | 0.00101991             | 0.000972099               | 0.00098804           | 0.00098804           |
| T* S(trans)           | 0.00138621                           | 0.00069829         | 0.00132833           | 0.00123323           | 0.00138621             | 0.00138735                | 0.00138621           | 0.00138735           |
| T*S                   | <b>0.00247325</b>                    | <b>0.00076414</b>  | <b>0.00153971</b>    | <b>0.00179099</b>    | <b>0.00254948</b>      | <b>0.00253105</b>         | <b>0.00248828</b>    | <b>0.00252966</b>    |
| H                     | -403.62073986                        | -0.49837558        | -235.68258532        | -168.61518000        | -403.69573191          | -404.27526898             | -403.60473917        | -404.27389926        |
| T*S                   | 0.00247325                           | 0.00076414         | 0.00153971           | 0.00179099           | 0.00254948             | 0.00253105                | 0.00248828           | 0.00252966           |
| G=H-TS                | <b>-403.62321311</b>                 | <b>-0.49913972</b> | <b>-235.68412503</b> | <b>-168.61697099</b> | <b>-403.69828138</b>   | <b>-404.27780002</b>      | <b>-403.60722744</b> | <b>-404.27642891</b> |

Calculated Energies:  $[(\text{CO})_2\text{FeN}]^+ + \text{H} \rightarrow [\text{FeCO}]^+ + \text{HNCO}$  M=5

|                            | Reactants              | Reactants          | Products             | Products             | Intermedia             | Intermedia                | TS_I                      | TS_II                      |
|----------------------------|------------------------|--------------------|----------------------|----------------------|------------------------|---------------------------|---------------------------|----------------------------|
| M=5                        | $[\text{2(CO)-FeN}]^+$ | H                  | $[\text{Fe-CO}]^+$   | HNCO                 | $[\text{OC-Fe-NCO}]^+$ | $[\text{OC-Fe(H)-NCO}]^+$ | $\text{N}^{***}\text{CO}$ | $\text{H}^{***}\text{NCO}$ |
| E(el)                      | -403.62772423          | -0.49861309        | -235.63986387        | -168.63688889        | -403.75982299          | -404.28568284             | -403.62418527             | -404.25079613              |
| E(ZPE)                     | 0.01729825             | 0.00000000         | 0.00599105           | 0.02132887           | 0.02007295             | 0.02568167                | 0.01777675                | 0.02326971                 |
| E(vib)                     | 0.00001333             | 0.00000000         | 0.00000018           | 0.00000000           | 0.00000210             | 0.00003779                | 0.00002475                | 0.00003278                 |
| E(rot)                     | 0.00014251             | 0.00000000         | 0.00014251           | 0.00014251           | 0.00014251             | 0.00014251                | 0.00014251                | 0.00014251                 |
| E(trans)                   | 0.00014251             | 0.00014251         | 0.00014251           | 0.00014251           | 0.00014251             | 0.00014251                | 0.00014251                | 0.00014251                 |
| <b>U</b>                   | <b>-403.61012763</b>   | <b>-0.49847058</b> | <b>-235.63358762</b> | <b>-168.61527500</b> | <b>-403.73946292</b>   | <b>-404.25967836</b>      | <b>-403.60609875</b>      | <b>-404.22720862</b>       |
| <b>H=U+k<sub>B</sub>*T</b> | <b>-403.61003263</b>   | <b>-0.49837558</b> | <b>-235.63349262</b> | <b>-168.61518000</b> | <b>-403.73936792</b>   | <b>-404.25958336</b>      | <b>-403.60600375</b>      | <b>-404.22711362</b>       |
| T*S(el)                    | 0.00015290             | 0.00006585         | 0.00017022           | 0.00000000           | 0.00015290             | 0.00017022                | 0.00015290                | 0.00017022                 |
| T*S(vib)                   | 0.00001695             | 0.00000000         | 0.00000020           | 0.00000000           | 0.00000243             | 0.00005534                | 0.00100397                | 0.00004500                 |
| T* S(rot)                  | 0.00101991             | 0.00000000         | 0.00015936           | 0.00055776           | 0.00062151             | 0.00103584                | 0.00090060                | 0.00103584                 |
| T* S(trans)                | 0.00138621             | 0.00069829         | 0.00132833           | 0.00123323           | 0.00138621             | 0.00138735                | 0.00138621                | 0.00138735                 |
| <b>T*S</b>                 | <b>0.00257597</b>      | <b>0.00076414</b>  | <b>0.00165811</b>    | <b>0.00179099</b>    | <b>0.00216305</b>      | <b>0.00264875</b>         | <b>0.00344368</b>         | <b>0.00263841</b>          |
| H                          | -403.61003263          | -0.49837558        | -235.63349262        | -168.61518000        | -403.73936792          | -404.25958336             | -403.60600375             | -404.22711362              |
| T*S                        | 0.00257597             | 0.00076414         | 0.00165811           | 0.00179099           | 0.00216305             | 0.00264875                | 0.00344368                | 0.00263841                 |
| <b>G=H-TS</b>              | <b>-403.61260859</b>   | <b>-0.49913972</b> | <b>-235.63515073</b> | <b>-168.61697099</b> | <b>-403.74153096</b>   | <b>-404.26223211</b>      | <b>-403.60944743</b>      | <b>-404.22975203</b>       |

| Fig. 3        | E <sub>el</sub> (h)    |
|---------------|------------------------|
| <b>MECP A</b> | <b>-403.6274483804</b> |
| <b>MECP B</b> | <b>-403.6276458568</b> |
| <b>MECP C</b> | <b>-404.2855097449</b> |



## Optimized cartesian coordinates of the products:

### CH4

|   |           |           |           |
|---|-----------|-----------|-----------|
| C | -0.428406 | 0.129750  | -0.002498 |
| H | 0.658803  | 0.139147  | 0.004016  |
| H | -0.795674 | 0.993106  | -0.552036 |
| H | -0.797196 | 0.167339  | 1.019711  |
| H | -0.780628 | -0.780742 | -0.481275 |

### H3C-NH2

|   |           |          |           |
|---|-----------|----------|-----------|
| C | -2.721952 | 1.216959 | 0.056667  |
| N | -1.258357 | 1.221247 | -0.011172 |
| H | -3.213336 | 2.034667 | -0.482834 |
| H | -3.030599 | 1.268161 | 1.100108  |
| H | -3.094686 | 0.275768 | -0.345665 |
| H | -0.896993 | 2.091490 | 0.359076  |
| H | -0.956198 | 1.174969 | -0.976341 |

### HNCO

|   |           |          |           |
|---|-----------|----------|-----------|
| O | -4.254653 | 0.644160 | -0.298537 |
| C | -3.272578 | 1.264510 | -0.172308 |
| N | -2.181698 | 1.796004 | -0.131814 |
| H | -1.981001 | 2.651586 | 0.355210  |

## Optimized cartesian coordinates: $[\text{FeN}]^+ + \text{CH}_4 + \text{H} \rightarrow \text{Fe}^+ + \text{CH}_3\text{NH}_2$ M=multiplicity

### M=1 $[\text{FeN}]^+$

|    |           |          |          |
|----|-----------|----------|----------|
| Fe | -0.875043 | 0.347651 | 0.000000 |
| N  | 0.745073  | 0.713479 | 0.000000 |

### M=3 $[\text{FeN}]^+$

|    |           |          |          |
|----|-----------|----------|----------|
| Fe | -0.909758 | 0.339812 | 0.000000 |
| N  | 0.779788  | 0.721318 | 0.000000 |

### M=5 $[\text{FeN}]^+$

|    |           |          |          |
|----|-----------|----------|----------|
| Fe | -0.970544 | 0.326086 | 0.000000 |
| N  | 0.840574  | 0.735044 | 0.000000 |

### M=1 $[\text{FeN}^{***}\text{CH}_4]^+$

|    |           |           |           |
|----|-----------|-----------|-----------|
| Fe | -1.448897 | -0.094339 | 0.002914  |
| N  | 0.139062  | 0.165358  | 0.319589  |
| C  | -3.547964 | -0.424312 | -0.456014 |
| H  | -4.594453 | -0.579285 | -0.708004 |
| H  | -3.015371 | -1.297190 | -0.875605 |
| H  | -3.273721 | 0.529733  | -0.943330 |
| H  | -3.513565 | -0.379552 | 0.646399  |

**M=3 [FeN\*\*\*CH4]+**

|    |           |           |           |
|----|-----------|-----------|-----------|
| Fe | -1.390583 | -0.081985 | -0.022504 |
| N  | 0.273220  | 0.182330  | 0.385391  |
| C  | -3.581820 | -0.429323 | -0.464172 |
| H  | -4.633764 | -0.589122 | -0.695506 |
| H  | -3.062602 | -1.301273 | -0.891282 |
| H  | -3.327189 | 0.520889  | -0.959627 |
| H  | -3.532170 | -0.381105 | 0.633649  |

**M=5 [FeN\*\*\*CH4]+**

|    |           |           |           |
|----|-----------|-----------|-----------|
| Fe | -1.254923 | -0.522776 | -0.106549 |
| N  | -0.624759 | 0.787290  | 0.389286  |
| C  | -3.431588 | -0.507520 | -0.463445 |
| H  | -4.385571 | 0.020442  | -0.473335 |
| H  | -3.580971 | -1.545771 | -0.750490 |
| H  | -2.849078 | 0.073092  | -1.211130 |
| H  | -3.130320 | -0.387157 | 0.601245  |

**M=1 [H3C-Fe-NH]+**

|    |           |          |           |
|----|-----------|----------|-----------|
| Fe | -2.598560 | 2.830401 | 0.454515  |
| C  | -2.837126 | 1.032371 | 0.021788  |
| H  | -3.612910 | 0.875522 | 0.791683  |
| H  | -2.044617 | 0.298025 | 0.074279  |
| H  | -3.243503 | 1.149295 | -0.990950 |
| N  | -0.979362 | 3.011981 | 0.207874  |
| H  | -0.045923 | 2.787107 | -0.151139 |

**M=3 [H3C-Fe-NH]+**

|    |           |          |           |
|----|-----------|----------|-----------|
| Fe | -2.513592 | 2.796916 | 0.776665  |
| C  | -2.811861 | 1.051623 | 0.023186  |
| H  | -3.746965 | 0.882389 | 0.581802  |
| H  | -2.041512 | 0.335190 | 0.285699  |
| H  | -2.977473 | 1.144209 | -1.046838 |
| N  | -0.960174 | 3.141840 | 0.198137  |
| H  | -0.310423 | 2.632535 | -0.410599 |

**M=5 [H3C-Fe-NH]+**

|    |           |          |           |
|----|-----------|----------|-----------|
| Fe | -2.465829 | 2.800670 | 0.870091  |
| C  | -2.771873 | 1.099971 | 0.037839  |
| H  | -3.750445 | 0.910429 | 0.505917  |
| H  | -2.036932 | 0.359944 | 0.339901  |
| H  | -2.857419 | 1.182941 | -1.041449 |
| N  | -1.070395 | 3.028606 | 0.173803  |
| H  | -0.409107 | 2.602142 | -0.478050 |

**M=1 [H3C-HN-Fe]+**

|    |           |           |           |
|----|-----------|-----------|-----------|
| Fe | -0.910523 | 1.621307  | 0.884566  |
| C  | -3.309586 | 0.245323  | -0.057188 |
| N  | -1.862988 | 0.412322  | -0.016986 |
| H  | -1.390913 | -0.280637 | -0.593569 |
| H  | -3.583488 | -0.743414 | 0.317369  |
| H  | -3.803050 | 0.999800  | 0.550724  |
| H  | -3.668862 | 0.330418  | -1.084915 |

**M=3 [H3C-HN-Fe]+**

|    |           |           |           |
|----|-----------|-----------|-----------|
| Fe | -0.817578 | 1.656154  | 0.927692  |
| C  | -3.319139 | 0.248769  | -0.056666 |
| N  | -1.889330 | 0.423992  | -0.013466 |
| H  | -1.444400 | -0.276462 | -0.610386 |
| H  | -3.567276 | -0.754247 | 0.311498  |
| H  | -3.829581 | 0.997563  | 0.537658  |
| H  | -3.662108 | 0.289352  | -1.096330 |

**M=5 [H3C-HN-Fe]+**

|    |           |           |           |
|----|-----------|-----------|-----------|
| Fe | -0.875660 | 1.643672  | 0.864636  |
| C  | -3.320576 | 0.240807  | -0.059145 |
| N  | -1.866756 | 0.413912  | -0.006623 |
| H  | -1.389777 | -0.286828 | -0.568501 |
| H  | -3.587772 | -0.754549 | 0.297997  |
| H  | -3.819529 | 0.981302  | 0.558995  |
| H  | -3.669342 | 0.346806  | -1.087361 |

**M=2 [H3C-HN-FeH]+**

|    |           |          |           |
|----|-----------|----------|-----------|
| Fe | -2.815396 | 2.139211 | -0.306778 |
| N  | -0.821618 | 2.452790 | -0.508320 |
| C  | -0.036466 | 3.528476 | 0.027894  |
| H  | 0.754102  | 3.114712 | 0.667964  |
| H  | -0.643190 | 4.231356 | 0.588144  |
| H  | 0.485366  | 4.041286 | -0.790320 |
| H  | -0.223014 | 1.816240 | -1.038174 |
| H  | -4.303583 | 2.234048 | 0.065228  |

**M=4 [H3C-HN-FeH]+**

|    |           |          |           |
|----|-----------|----------|-----------|
| Fe | -2.846289 | 2.215631 | -0.235533 |
| N  | -0.826163 | 2.476565 | -0.466615 |
| C  | 0.002240  | 3.538749 | 0.028839  |
| H  | 0.821014  | 3.114779 | 0.624253  |
| H  | -0.562525 | 4.254725 | 0.615966  |
| H  | 0.486258  | 4.041923 | -0.819364 |
| H  | -0.264261 | 1.810978 | -1.001177 |
| H  | -4.414073 | 2.104769 | -0.040728 |

**M=6 [H3C-HN-FeH]+**

|    |           |          |           |
|----|-----------|----------|-----------|
| Fe | -2.775035 | 1.988869 | -0.394603 |
| N  | -0.754573 | 2.358688 | -0.573375 |
| C  | -0.116181 | 3.497911 | 0.026910  |
| H  | 0.680456  | 3.157109 | 0.700197  |
| H  | -0.823339 | 4.116497 | 0.570508  |
| H  | 0.382129  | 4.089944 | -0.750866 |
| H  | -0.074788 | 1.790996 | -1.080054 |
| H  | -4.122468 | 2.558106 | 0.206925  |

**M=2 [H3C-H2N-Fe]+**

|    |           |           |           |
|----|-----------|-----------|-----------|
| Fe | -1.011549 | 0.322941  | 1.787661  |
| C  | -3.315630 | 0.242818  | -0.070745 |
| N  | -1.828698 | 0.430857  | -0.014942 |
| H  | -1.398698 | -0.258375 | -0.630720 |
| H  | -3.564706 | -0.737040 | 0.325107  |
| H  | -3.793144 | 1.007591  | 0.534216  |
| H  | -3.674255 | 0.318570  | -1.094549 |
| H  | -1.606462 | 1.329619  | -0.441478 |

**M=4 [H3C-H2N-Fe]+**

|    |           |           |           |
|----|-----------|-----------|-----------|
| Fe | -0.971412 | 0.327556  | 1.799562  |
| C  | -3.325358 | 0.242110  | -0.075350 |
| N  | -1.837255 | 0.429402  | -0.017097 |
| H  | -1.396992 | -0.260956 | -0.623252 |
| H  | -3.577829 | -0.737057 | 0.318146  |
| H  | -3.805413 | 1.005863  | 0.527627  |
| H  | -3.674156 | 0.320062  | -1.102355 |
| H  | -1.604725 | 1.330000  | -0.432731 |

**M=6 [H3C-H2N-Fe]+**

|    |           |           |           |
|----|-----------|-----------|-----------|
| Fe | -0.968532 | 0.312649  | 1.922596  |
| C  | -3.321387 | 0.243197  | -0.079433 |
| N  | -1.832602 | 0.435084  | -0.056268 |
| H  | -1.404146 | -0.256042 | -0.671751 |
| H  | -3.561591 | -0.736910 | 0.323273  |
| H  | -3.789843 | 1.008857  | 0.532780  |
| H  | -3.702899 | 0.315107  | -1.094328 |
| H  | -1.612140 | 1.335036  | -0.482320 |

**M=1 TS\_I**

|    |           |           |          |
|----|-----------|-----------|----------|
| Fe | -1.039355 | 0.000561  | 0.755380 |
| N  | 0.360152  | 0.136052  | 0.141410 |
| C  | -0.859685 | -1.535074 | 1.908355 |
| H  | -1.640975 | -2.154225 | 1.453957 |
| H  | 0.299845  | -0.861676 | 0.950728 |
| H  | -1.174842 | -1.039554 | 2.834103 |
| H  | 0.012843  | -2.152131 | 2.114859 |

**M=3 TS\_I**

|    |           |           |          |
|----|-----------|-----------|----------|
| Fe | -1.023217 | 0.279768  | 0.862384 |
| N  | 0.355781  | 0.020435  | 0.075701 |
| C  | -0.813692 | -1.536699 | 1.882740 |
| H  | -1.512346 | -2.196519 | 1.373545 |
| H  | 0.112361  | -1.002426 | 0.984120 |
| H  | -1.230471 | -1.074859 | 2.781187 |
| H  | 0.069566  | -2.095747 | 2.199115 |

**M=5 TS\_I**

|    |           |           |          |
|----|-----------|-----------|----------|
| Fe | -1.080802 | 0.126247  | 0.645106 |
| N  | 0.408341  | 0.071430  | 0.226072 |
| C  | -0.834947 | -1.529564 | 1.882270 |
| H  | -1.585237 | -2.163242 | 1.412131 |
| H  | 0.170745  | -0.940022 | 1.088446 |
| H  | -1.171167 | -1.042019 | 2.796498 |
| H  | 0.051048  | -2.128877 | 2.108268 |

**M=1 TS\_II**

|    |           |          |           |
|----|-----------|----------|-----------|
| Fe | -2.163070 | 2.578231 | 1.456289  |
| C  | -2.611236 | 1.158040 | 0.026558  |
| H  | -3.680339 | 1.369862 | 0.024528  |
| H  | -2.318227 | 0.317985 | 0.656976  |
| H  | -2.244933 | 1.026180 | -0.980337 |
| N  | -1.371169 | 2.800545 | 0.079571  |
| H  | -0.973026 | 2.733857 | -0.855534 |

**M=3 TS\_II**

|    |           |          |           |
|----|-----------|----------|-----------|
| Fe | -1.912463 | 2.383282 | 1.545348  |
| C  | -2.596485 | 1.203449 | 0.027266  |
| H  | -3.454191 | 0.967661 | 0.667684  |
| H  | -1.875713 | 0.392610 | -0.035959 |
| H  | -2.954173 | 1.518750 | -0.945085 |
| N  | -1.534208 | 2.963144 | 0.016135  |
| H  | -1.120726 | 2.672765 | -0.872258 |

**M=5 TS\_II**

|    |           |          |           |
|----|-----------|----------|-----------|
| Fe | -1.595350 | 2.205040 | 1.507154  |
| C  | -2.559033 | 1.152945 | 0.039309  |
| H  | -3.573055 | 1.237769 | 0.431825  |
| H  | -2.087560 | 0.204095 | 0.309538  |
| H  | -2.557899 | 1.256768 | -1.034001 |
| N  | -1.431873 | 2.939168 | 0.064484  |
| H  | -1.643189 | 3.105876 | -0.915178 |

**M=2 TS\_III**

|    |           |          |           |
|----|-----------|----------|-----------|
| Fe | -2.614838 | 1.850034 | 0.548908  |
| N  | -1.094882 | 2.294184 | -0.227486 |
| C  | -0.291053 | 3.500426 | -0.008721 |
| H  | 0.738541  | 3.181940 | 0.159881  |
| H  | -0.641876 | 4.040455 | 0.864866  |
| H  | -0.321162 | 4.150100 | -0.883322 |
| H  | -0.802174 | 1.797121 | -1.067365 |
| H  | -2.576354 | 2.743860 | -0.681122 |

**M=4 TS\_III**

|    |           |          |           |
|----|-----------|----------|-----------|
| Fe | -2.593052 | 1.899580 | 0.534396  |
| N  | -1.006219 | 2.231810 | -0.174858 |
| C  | -0.266945 | 3.492026 | -0.000058 |
| H  | 0.779616  | 3.225673 | 0.159681  |
| H  | -0.613846 | 4.021752 | 0.883600  |
| H  | -0.346770 | 4.137956 | -0.871483 |
| H  | -0.805679 | 1.804666 | -1.076252 |
| H  | -2.750903 | 2.744658 | -0.749388 |

**M=6 TS\_III**

|    |           |          |           |
|----|-----------|----------|-----------|
| Fe | -2.696442 | 1.707961 | 0.671956  |
| N  | -1.068147 | 2.337888 | -0.290074 |
| C  | -0.244927 | 3.509588 | -0.028990 |
| H  | 0.750639  | 3.164196 | 0.268135  |
| H  | -0.666835 | 4.102371 | 0.778233  |
| H  | -0.135587 | 4.122708 | -0.922665 |
| H  | -0.792896 | 1.876854 | -1.158787 |
| H  | -2.749603 | 2.736555 | -0.612170 |

**MECP\_A**

|    |           |           |           |
|----|-----------|-----------|-----------|
| Fe | -1.422851 | -0.182106 | -0.365319 |
| N  | -0.441966 | 0.310941  | 0.756133  |
| C  | -3.435065 | -0.451190 | -0.504691 |
| H  | -4.495947 | -0.364762 | -0.280359 |
| H  | -3.268221 | -1.386551 | -1.059282 |
| H  | -3.198441 | 0.462945  | -1.097940 |
| H  | -2.992418 | -0.468865 | 0.537408  |

**MECP\_B**

|    |           |           |           |
|----|-----------|-----------|-----------|
| Fe | -1.293536 | -0.531608 | 0.083418  |
| N  | -0.535739 | 0.795370  | -0.033822 |
| C  | -3.440459 | -0.513700 | -0.396880 |
| H  | -4.377599 | 0.001061  | -0.615283 |
| H  | -3.456455 | -1.496222 | -0.866018 |
| H  | -2.744708 | 0.220519  | -0.888465 |
| H  | -3.408714 | -0.557820 | 0.702633  |

**MECP\_C**

|    |           |          |           |
|----|-----------|----------|-----------|
| Fe | -2.694721 | 1.961902 | -0.442070 |
| N  | -0.784330 | 2.334388 | -0.586424 |
| C  | -0.166669 | 3.485902 | 0.028915  |
| H  | 0.617290  | 3.153775 | 0.718542  |
| H  | -0.894174 | 4.091433 | 0.561714  |
| H  | 0.328014  | 4.089230 | -0.740254 |
| H  | -0.087152 | 1.779603 | -1.082464 |
| H  | -3.922057 | 2.661887 | 0.247684  |

**MECP\_D**

|    |           |           |           |
|----|-----------|-----------|-----------|
| Fe | -1.059720 | 0.348234  | 1.545542  |
| C  | -3.300827 | 0.241242  | -0.044390 |
| N  | -1.826283 | 0.422228  | 0.058073  |
| H  | -1.400118 | -0.270117 | -0.570550 |
| H  | -3.575643 | -0.739317 | 0.330217  |
| H  | -3.804145 | 1.002474  | 0.542524  |
| H  | -3.617575 | 0.326618  | -1.085799 |
| H  | -1.608831 | 1.325619  | -0.381067 |

**MECP\_E**

|    |           |           |           |
|----|-----------|-----------|-----------|
| Fe | -0.961534 | 0.295179  | 1.990909  |
| C  | -3.321405 | 0.250116  | -0.085078 |
| N  | -1.831985 | 0.430830  | -0.073997 |
| H  | -1.411830 | -0.264302 | -0.690978 |
| H  | -3.566102 | -0.731949 | 0.311217  |
| H  | -3.778822 | 1.014405  | 0.538146  |
| H  | -3.714802 | 0.333533  | -1.094350 |
| H  | -1.606659 | 1.329166  | -0.501320 |

**Optimized cartesian coordinates: [FeNH]<sup>++</sup> CH<sub>4</sub> → Fe<sup>+</sup> + CH<sub>3</sub>NH<sub>2</sub>**

**M = multiplicity**

**M=2 [FeNH]<sup>+</sup>**

|    |           |          |           |
|----|-----------|----------|-----------|
| Fe | -1.605766 | 1.112297 | -0.000050 |
| N  | 0.146863  | 0.908135 | 0.000100  |
| H  | 1.166823  | 0.789359 | -0.000050 |

**M=4 [FeNH]<sup>+</sup>**

|    |           |          |           |
|----|-----------|----------|-----------|
| Fe | -1.570821 | 1.108201 | -0.000116 |
| N  | 0.134246  | 0.909655 | 0.000231  |
| H  | 1.144496  | 0.791934 | -0.000115 |

**M=6 [FeNH]<sup>+</sup>**

|    |           |          |           |
|----|-----------|----------|-----------|
| Fe | -1.558772 | 1.106775 | -0.000238 |
| N  | 0.129247  | 0.910282 | 0.000475  |
| H  | 1.137446  | 0.792733 | -0.000237 |

**M=2 [FeNH\*\*\*CH4]+**

|    |           |           |           |
|----|-----------|-----------|-----------|
| Fe | -1.573392 | 0.017280  | 0.026235  |
| N  | 0.040038  | 0.436930  | 0.495480  |
| C  | -3.542854 | -0.434379 | -0.471258 |
| H  | -4.569082 | -0.674675 | -0.732059 |
| H  | -2.932893 | -1.280760 | -0.848415 |
| H  | -3.319344 | 0.524585  | -0.983400 |
| H  | -3.527494 | -0.344379 | 0.634703  |
| H  | 0.983201  | 0.702678  | 0.793245  |

**M=4 [FeNH\*\*\*CH4]+**

|    |           |           |           |
|----|-----------|-----------|-----------|
| Fe | -1.587245 | 0.210025  | 0.336718  |
| N  | 0.128364  | 0.390916  | 0.376945  |
| C  | -3.550877 | -0.467032 | -0.505117 |
| H  | -4.597246 | -0.632681 | -0.753067 |
| H  | -2.986312 | -1.324173 | -0.879084 |
| H  | -3.294605 | 0.476536  | -1.010979 |
| H  | -3.575538 | -0.408749 | 0.600222  |
| H  | 1.021640  | 0.702436  | 0.748891  |

**M=6 [FeNH\*\*\*CH4]+**

|    |           |           |           |
|----|-----------|-----------|-----------|
| Fe | -1.544226 | 0.090049  | 0.383438  |
| N  | 0.107114  | 0.486687  | 0.511962  |
| C  | -3.564126 | -0.463351 | -0.544665 |
| H  | -4.642933 | -0.579399 | -0.639998 |
| H  | -3.096255 | -1.359039 | -0.955458 |
| H  | -3.312109 | 0.445188  | -1.102542 |
| H  | -3.466740 | -0.383439 | 0.563343  |
| H  | 1.077456  | 0.710583  | 0.698449  |

**M=2 [H2N-Fe-CH3]+**

|    |           |          |           |
|----|-----------|----------|-----------|
| Fe | -1.417892 | 0.256552 | 0.885082  |
| C  | -2.768001 | 1.101807 | -0.029443 |
| H  | -3.219648 | 0.236839 | -0.538839 |
| H  | -2.574270 | 1.914624 | -0.718171 |
| H  | -3.374724 | 1.433844 | 0.828111  |
| N  | -0.098702 | 1.110116 | 0.257100  |
| H  | 0.826378  | 0.833195 | 0.584326  |
| H  | -0.061899 | 1.866251 | -0.412615 |



**M=4 [H2N-Fe-CH3]+**

|    |           |          |           |
|----|-----------|----------|-----------|
| Fe | -1.432339 | 0.644093 | 1.165168  |
| C  | -2.858300 | 1.032990 | -0.087961 |
| H  | -3.188434 | 0.033011 | -0.379968 |
| H  | -2.581647 | 1.651749 | -0.931645 |
| H  | -3.552510 | 1.533249 | 0.598000  |
| N  | 0.095482  | 1.133671 | 0.452405  |
| H  | 0.497372  | 0.606986 | -0.318344 |
| H  | 0.331617  | 2.117479 | 0.357895  |

**M=6 [H2N-Fe-CH3]+**

|    |           |          |           |
|----|-----------|----------|-----------|
| Fe | -1.248752 | 0.609592 | -0.224974 |
| C  | -3.148321 | 0.990617 | -0.098304 |
| H  | -3.712597 | 0.230700 | 0.438901  |
| H  | -3.409351 | 0.971847 | -1.167231 |
| H  | -3.300914 | 1.988428 | 0.310344  |
| N  | 0.374229  | 1.137509 | 0.404036  |
| H  | 1.207266  | 1.328364 | -0.146680 |
| H  | 0.549681  | 1.496171 | 1.339459  |

**M=2 [H3C-H2N-Fe]+**

|    |           |           |           |
|----|-----------|-----------|-----------|
| Fe | -1.011549 | 0.322941  | 1.787661  |
| C  | -3.315630 | 0.242818  | -0.070745 |
| N  | -1.828698 | 0.430857  | -0.014942 |
| H  | -1.398698 | -0.258375 | -0.630720 |
| H  | -3.564706 | -0.737040 | 0.325107  |
| H  | -3.793144 | 1.007591  | 0.534216  |
| H  | -3.674255 | 0.318570  | -1.094549 |
| H  | -1.606462 | 1.329619  | -0.441478 |

**M=4 [H3C-H2N-Fe]+**

|    |           |           |           |
|----|-----------|-----------|-----------|
| Fe | -0.971412 | 0.327556  | 1.799562  |
| C  | -3.325358 | 0.242110  | -0.075350 |
| N  | -1.837255 | 0.429402  | -0.017097 |
| H  | -1.396992 | -0.260956 | -0.623252 |
| H  | -3.577829 | -0.737057 | 0.318146  |
| H  | -3.805413 | 1.005863  | 0.527627  |
| H  | -3.674156 | 0.320062  | -1.102355 |
| H  | -1.604725 | 1.330000  | -0.432731 |

**M=6 [H3C-H2N-Fe]+**

|    |           |           |           |
|----|-----------|-----------|-----------|
| Fe | -0.968532 | 0.312649  | 1.922596  |
| C  | -3.321387 | 0.243197  | -0.079433 |
| N  | -1.832602 | 0.435084  | -0.056268 |
| H  | -1.404146 | -0.256042 | -0.671751 |
| H  | -3.561591 | -0.736910 | 0.323273  |
| H  | -3.789843 | 1.008857  | 0.532780  |
| H  | -3.702899 | 0.315107  | -1.094328 |
| H  | -1.612140 | 1.335036  | -0.482320 |

**M=2 TS\_VII**

|    |           |           |           |
|----|-----------|-----------|-----------|
| Fe | -1.206349 | -0.022991 | 0.443651  |
| N  | 0.403758  | -0.182453 | -0.157087 |
| C  | -0.767440 | -1.465211 | 1.872443  |
| H  | -1.682921 | -2.014649 | 1.639311  |
| H  | 0.108564  | -1.014030 | 0.839841  |
| H  | -0.825395 | -0.866202 | 2.778779  |
| H  | 0.044432  | -2.189237 | 1.966056  |
| H  | 0.943389  | 0.647611  | 0.143106  |

**M=4 TS\_VII**

|    |           |           |           |
|----|-----------|-----------|-----------|
| Fe | -0.989006 | 0.217034  | 0.920673  |
| N  | 0.401841  | 0.026587  | 0.085850  |
| C  | -0.851450 | -1.470391 | 1.857274  |
| H  | -1.505325 | -2.191055 | 1.365328  |
| H  | 0.192215  | -0.911617 | 0.977133  |
| H  | -1.279353 | -1.164279 | 2.818777  |
| H  | 0.054769  | -2.016033 | 2.150240  |
| H  | 0.994349  | 0.402593  | -0.649174 |

**M=6 TS\_VII**

|    |           |           |           |
|----|-----------|-----------|-----------|
| Fe | -1.301263 | 0.141204  | 0.655407  |
| N  | 0.317994  | 0.215202  | 0.011815  |
| C  | -0.806707 | -1.520423 | 1.878790  |
| H  | -1.605885 | -2.188837 | 1.552791  |
| H  | 0.077092  | -0.822176 | 0.954054  |
| H  | -1.020890 | -1.087165 | 2.857079  |
| H  | 0.095712  | -2.127351 | 1.981184  |
| H  | 1.261987  | 0.282385  | -0.365021 |

**M=2 TS\_VI**

|    |           |          |           |
|----|-----------|----------|-----------|
| Fe | -1.412363 | 0.368735 | 1.688703  |
| C  | -2.397203 | 1.059508 | -0.131404 |
| H  | -2.809550 | 0.050651 | -0.286221 |
| H  | -2.161097 | 1.507985 | -1.097063 |
| H  | -3.059160 | 1.725967 | 0.440230  |
| N  | -0.477313 | 1.170222 | 0.373855  |
| H  | -0.047519 | 0.689859 | -0.422774 |
| H  | -0.324554 | 2.180300 | 0.290225  |

**M=4 TS\_VI**

|    |           |          |           |
|----|-----------|----------|-----------|
| Fe | -1.412363 | 0.368735 | 1.688703  |
| C  | -2.397203 | 1.059508 | -0.131404 |
| H  | -2.809550 | 0.050651 | -0.286221 |
| H  | -2.161097 | 1.507985 | -1.097063 |
| H  | -3.059160 | 1.725967 | 0.440230  |
| N  | -0.477313 | 1.170222 | 0.373855  |
| H  | -0.047519 | 0.689859 | -0.422774 |
| H  | -0.324554 | 2.180300 | 0.290225  |

**M=6 TS\_VI**

|    |           |          |           |
|----|-----------|----------|-----------|
| Fe | -1.297789 | 0.428606 | 1.822385  |
| C  | -2.632602 | 1.072084 | -0.244158 |
| H  | -2.870326 | 0.024429 | -0.383192 |
| H  | -2.310152 | 1.604846 | -1.121606 |
| H  | -3.225823 | 1.645202 | 0.460495  |
| N  | -0.403130 | 1.181992 | 0.347556  |
| H  | 0.142549  | 0.644343 | -0.326038 |
| H  | -0.091487 | 2.151725 | 0.300108  |

**MECP\_A**

|    |           |          |           |
|----|-----------|----------|-----------|
| Fe | -1.302808 | 0.187239 | 0.498202  |
| C  | -2.994809 | 0.981855 | -0.196708 |
| H  | -3.674738 | 0.143246 | -0.014280 |
| H  | -2.825252 | 1.199293 | -1.248005 |
| H  | -3.206528 | 1.860088 | 0.407039  |
| N  | 0.153399  | 1.209659 | 0.537708  |
| H  | 1.040583  | 0.974255 | 0.105097  |
| H  | 0.121393  | 2.197592 | 0.766498  |

**Optimized geometries:  $[(\text{CO})_2\text{FeN}]^+ + \text{H} \rightarrow [\text{FeCO}]^+ + \text{HNCO}$** **M = multiplicity****M=1 [2COFeN]+**

|    |           |           |           |
|----|-----------|-----------|-----------|
| Fe | -1.073873 | 0.719145  | 0.368142  |
| N  | 0.075473  | 0.406886  | -0.266151 |
| C  | -1.276742 | 2.570101  | 0.118603  |
| O  | -1.300621 | 3.661276  | -0.152053 |
| C  | -2.282522 | -0.631672 | -0.127265 |
| O  | -2.911244 | -1.465056 | -0.545146 |

**M=3 [2COFeN]+**

|    |           |           |           |
|----|-----------|-----------|-----------|
| Fe | -1.013919 | 0.732428  | -0.072644 |
| N  | 0.600731  | 0.227215  | 0.002867  |
| C  | -1.346276 | 2.776965  | 0.012857  |
| O  | -1.408607 | 3.895424  | 0.065962  |
| C  | -2.454966 | -0.747287 | -0.255253 |
| O  | -3.146493 | -1.624065 | -0.357659 |

**M=5 [2COFeN]+**

|    |           |           |           |
|----|-----------|-----------|-----------|
| Fe | -0.614919 | 0.806626  | -0.026214 |
| N  | 0.370180  | -0.440274 | -0.048651 |
| C  | -1.468509 | 2.785171  | 0.042079  |
| O  | -1.910489 | 3.814705  | 0.077052  |
| C  | -2.095580 | -0.532008 | -0.181668 |
| O  | -2.887103 | -1.318921 | -0.266608 |

**M=1 [FeCO]+**

|    |           |          |           |
|----|-----------|----------|-----------|
| Fe | -1.037864 | 0.842639 | -0.068585 |
| C  | -1.284976 | 2.723413 | 0.012931  |
| O  | -1.432041 | 3.838766 | 0.061829  |

**M=3 [FeCO]+**

|    |           |          |           |
|----|-----------|----------|-----------|
| Fe | -1.037860 | 0.842522 | -0.068555 |
| C  | -1.284819 | 2.722387 | 0.012816  |
| O  | -1.432203 | 3.839909 | 0.061914  |

**M=5 [FeCO]+**

|    |           |          |           |
|----|-----------|----------|-----------|
| Fe | -0.982560 | 0.472025 | -0.084694 |
| C  | -1.311362 | 2.911479 | 0.021864  |
| O  | -1.460962 | 4.021312 | 0.069003  |

**M=1 [OCN-FeCO]+**

|    |           |           |           |
|----|-----------|-----------|-----------|
| Fe | -1.153843 | 0.795447  | -0.504712 |
| N  | 0.528139  | 0.637081  | -0.092592 |
| C  | 1.423042  | -0.133587 | 0.280663  |
| O  | 2.311956  | -0.781647 | 0.625026  |
| C  | -1.818283 | -0.894750 | -0.269156 |
| O  | -2.164002 | -1.953993 | -0.105699 |

**M=3 [OCN-FeCO]+**

|    |           |           |           |
|----|-----------|-----------|-----------|
| Fe | -1.106676 | 0.567222  | -0.441912 |
| N  | 0.673461  | 0.418125  | -0.010993 |
| C  | 1.769092  | -0.014225 | 0.330857  |
| O  | 2.820006  | -0.387435 | 0.649201  |
| C  | -2.202634 | -0.989488 | -0.333457 |
| O  | -2.826239 | -1.925648 | -0.260167 |

**M=5 [OCN-FeCO]+**

|    |           |           |           |
|----|-----------|-----------|-----------|
| Fe | -0.682674 | -0.534774 | -0.106776 |
| N  | 0.995519  | -0.061115 | 0.161864  |
| C  | 2.157235  | 0.253278  | 0.354448  |
| O  | 3.260943  | 0.552742  | 0.536827  |
| C  | -2.769191 | -1.121742 | -0.425003 |
| O  | -3.834821 | -1.419838 | -0.587830 |

**M=2 [OCN-FeH-CO]+**

|    |           |           |           |
|----|-----------|-----------|-----------|
| Fe | -1.733948 | 0.818965  | -0.237901 |
| N  | -0.217558 | 0.744489  | 0.495449  |
| C  | 0.714158  | -0.097142 | 0.557065  |
| O  | 1.630069  | -0.775102 | 0.680559  |
| C  | -2.167086 | -0.828169 | -0.376330 |
| O  | -2.379943 | -1.938272 | -0.476042 |
| H  | -1.252861 | 0.421952  | -1.492381 |

**M=4 [OCN-FeH-CO]+**

|    |           |           |           |
|----|-----------|-----------|-----------|
| Fe | -1.460840 | -0.051093 | 0.186651  |
| N  | 0.104557  | 0.418003  | 0.741676  |
| C  | 1.331089  | 0.398746  | 0.631556  |
| O  | 2.482795  | 0.421500  | 0.586316  |
| C  | -3.151108 | -0.825842 | -0.777522 |
| O  | -4.002120 | -1.276618 | -1.347986 |
| H  | -0.711542 | -0.737976 | -0.870271 |

**M=6 [OCN-FeH-CO]+**

|    |           |           |           |
|----|-----------|-----------|-----------|
| Fe | -0.537910 | -1.342546 | 0.396945  |
| N  | 0.752280  | -0.150133 | 0.139396  |
| C  | 1.834174  | 0.429641  | 0.154270  |
| O  | 2.840920  | 0.994686  | 0.154972  |
| C  | -2.494828 | -0.777467 | -0.529898 |
| O  | -3.475582 | -0.499195 | -0.991562 |
| H  | -0.242104 | -2.668556 | 1.226357  |

**M=1 TS\_I**

|    |           |           |           |
|----|-----------|-----------|-----------|
| Fe | -1.526105 | 0.705678  | 0.963256  |
| N  | -0.102386 | 0.953955  | 0.508762  |
| C  | -1.076373 | 2.192951  | -0.072775 |
| O  | -1.108575 | 3.124875  | -0.712572 |
| C  | -2.293697 | -0.504310 | -0.250586 |
| O  | -2.662393 | -1.212468 | -1.039954 |

**M=3 TS\_I**

|    |           |           |           |
|----|-----------|-----------|-----------|
| Fe | -1.548199 | 0.723654  | 0.961306  |
| N  | -0.127342 | 0.967528  | 0.445604  |
| C  | -1.093999 | 2.226505  | -0.049422 |
| O  | -1.031203 | 3.175129  | -0.674340 |
| C  | -2.290207 | -0.549707 | -0.265560 |
| O  | -2.678580 | -1.282428 | -1.021458 |

**M=5 TS\_I**

|    |           |           |           |
|----|-----------|-----------|-----------|
| Fe | -0.626467 | 0.870273  | -0.022967 |
| N  | 0.027218  | -0.557111 | -0.073368 |
| C  | -1.440637 | 2.877310  | 0.048801  |
| O  | -1.907631 | 3.895831  | 0.081709  |
| C  | -1.928401 | -0.595880 | -0.175900 |
| O  | -2.730500 | -1.375123 | -0.262286 |

**M=2 TS\_II**

|    |           |           |           |
|----|-----------|-----------|-----------|
| Fe | -1.720754 | 0.093751  | 0.400574  |
| N  | -0.001199 | 0.372639  | 0.686730  |
| C  | 1.213442  | 0.283092  | 0.476056  |
| O  | 2.358505  | 0.249528  | 0.349679  |
| C  | -2.931368 | -0.800055 | -0.766576 |
| O  | -3.591934 | -1.350928 | -1.491676 |
| H  | -0.733861 | -0.501306 | -0.504366 |

**M=4 TS\_II**

|    |           |           |           |
|----|-----------|-----------|-----------|
| Fe | -1.647877 | 0.059419  | 0.364221  |
| N  | 0.035965  | 0.394020  | 0.717030  |
| C  | 1.250546  | 0.314811  | 0.513838  |
| O  | 2.397433  | 0.295992  | 0.401691  |
| C  | -3.053877 | -0.830665 | -0.799056 |
| O  | -3.759566 | -1.355465 | -1.494372 |
| H  | -0.629793 | -0.531391 | -0.552931 |

**M=6 TS\_II**

|    |           |           |           |
|----|-----------|-----------|-----------|
| Fe | -0.833678 | -1.601555 | 0.174481  |
| N  | 0.741585  | -0.568956 | 0.162349  |
| C  | 1.660650  | 0.237423  | 0.321988  |
| O  | 2.563425  | 0.939901  | 0.485326  |
| C  | -2.643032 | -0.807161 | -0.578368 |
| O  | -3.587425 | -0.372848 | -0.995002 |
| H  | 0.775426  | -1.840376 | 0.979705  |

**MECP\_A**

|    |           |           |           |
|----|-----------|-----------|-----------|
| Fe | -0.604528 | 0.817511  | -0.029537 |
| N  | 0.385580  | -0.413900 | -0.058775 |
| C  | -1.475809 | 2.766094  | 0.041649  |
| O  | -1.926543 | 3.792100  | 0.076062  |
| C  | -2.096180 | -0.530364 | -0.175938 |
| O  | -2.888938 | -1.316141 | -0.257471 |

**MECP\_B**

|    |           |           |           |
|----|-----------|-----------|-----------|
| Fe | -0.645454 | 0.776316  | -0.012224 |
| N  | 0.475463  | -0.338207 | -0.005759 |
| C  | -1.483341 | 2.756067  | 0.041554  |
| O  | -1.886990 | 3.801440  | 0.069635  |
| C  | -2.135432 | -0.548849 | -0.197017 |
| O  | -2.930663 | -1.331467 | -0.300199 |

**MECP\_C**

|    |           |           |           |
|----|-----------|-----------|-----------|
| Fe | -0.584179 | -1.150959 | 0.272815  |
| N  | 0.778559  | -0.031241 | 0.079753  |
| C  | 1.926864  | 0.383877  | 0.208771  |
| O  | 2.997654  | 0.803160  | 0.312220  |
| C  | -2.611838 | -0.861878 | -0.519643 |
| O  | -3.647324 | -0.721033 | -0.920062 |
| H  | -0.182786 | -2.435496 | 1.116625  |
